# Supplementary material
Source: MDPI journal article supplement (https://www.mdpi.com/1996-1073/15/2/439)
Supplement: s1 [file s1]

**Table S1.** Catchment characteristics

| No | River      | Station           | Abb. | ME    | MED   | MS   | DD   | UF    | ICT  | MDC  | AnA  | AL    | PC   | P     | HA    | F     | AHV  | OS   | WE   | WA   |
|----|------------|-------------------|------|-------|-------|------|------|-------|------|------|------|-------|------|-------|-------|-------|------|------|------|------|
| 1  | Ner        | Dąbie             | ND   | 154.0 | 185.5 | 1.04 | 2.08 | 10.00 | 2.23 | 0.33 | 1.17 | 47.59 | 0.00 | 11.68 | 11.19 | 14.43 | 0.78 | 0.01 | 0.28 | 0.30 |
| 2  | Mała Noteć | Gębice            | MG   | 105.6 | 48.7  | 1.53 | 1.33 | 1.19  | 0.01 | 0.09 | 0.01 | 60.77 | 0.01 | 2.52  | 6.28  | 21.66 | 1.08 | 0.01 | 1.34 | 5.02 |
| 3  | Grabia     | Grabno            | GG   | 193.1 | 133.5 | 1.12 | 1.71 | 5.22  | 0.80 | 0.69 | 0.08 | 44.55 | 0.01 | 10.47 | 13.01 | 23.17 | 1.85 | 0.01 | 0.03 | 0.09 |
| 4  | Widawka    | Rogóżno           | WR   | 200.3 | 501.6 | 1.73 | 1.41 | 4.68  | 1.19 | 5.39 | 0.07 | 33.04 | 0.01 | 12.60 | 9.54  | 30.38 | 2.29 | 0.01 | 0.37 | 0.43 |
| 5  | Niesób     | Kuźnica Skakawska | NK   | 184.6 | 122.4 | 1.55 | 2.11 | 7.75  | 1.59 | 0.27 | 0.38 | 54.73 | 0.01 | 11.51 | 4.20  | 18.57 | 0.97 | 0.01 | 0.01 | 0.01 |
| 6  | Prosna     | Bogusław          | PB   | 160.2 | 193.4 | 1.20 | 1.94 | 5.58  | 0.47 | 0.04 | 0.13 | 58.78 | 0.06 | 7.59  | 6.06  | 20.13 | 0.87 | 0.01 | 0.09 | 0.20 |
| 7  | Mogilnica  | Konojad           | MK   | 88.2  | 69.6  | 0.73 | 1.79 | 3.34  | 0.75 | 0.06 | 0.03 | 73.78 | 0.01 | 4.48  | 2.88  | 12.80 | 0.71 | 0.01 | 0.40 | 0.76 |
| 8  | Sama       | Szamotuły         | SS   | 86.5  | 61.5  | 1.03 | 1.60 | 4.53  | 0.84 | 0.23 | 0.31 | 72.61 | 0.47 | 3.26  | 4.21  | 11.12 | 0.19 | 0.01 | 0.26 | 1.97 |
| 9  | Drawa      | Drawsko Pomorskie | DD   | 144.7 | 111.2 | 2.57 | 1.30 | 3.83  | 0.24 | 0.01 | 0.14 | 32.13 | 0.12 | 7.95  | 9.78  | 35.11 | 3.20 | 0.01 | 0.06 | 7.43 |
| 10 | Oleśnica   | Niechmów          | ON   | 178.9 | 115.3 | 0.90 | 1.88 | 5.05  | 0.61 | 0.01 | 0.06 | 59.63 | 0.11 | 9.52  | 5.52  | 19.05 | 0.41 | 0.01 | 0.01 | 0.01 |
| 11 | Wełna      | Pruśce            | WP   | 102.5 | 66.9  | 1.14 | 1.57 | 3.71  | 0.52 | 0.09 | 0.36 | 67.03 | 0.01 | 4.01  | 5.19  | 15.12 | 1.31 | 0.01 | 0.24 | 2.39 |
| 12 | Gwda       | Piła              | GP   | 135.6 | 176.0 | 1.62 | 1.16 | 2.39  | 0.45 | 0.14 | 0.24 | 33.14 | 0.10 | 5.14  | 2.62  | 49.08 | 3.77 | 0.07 | 0.19 | 2.68 |
| 13 | Flinta     | Ryczywół          | FR   | 90.8  | 115.3 | 0.74 | 1.64 | 1.31  | 0.01 | 0.01 | 0.01 | 43.62 | 0.01 | 5.90  | 2.04  | 46.68 | 0.38 | 0.01 | 0.01 | 0.01 |
| 14 | Ołobok     | Ołobok            | OO   | 140.7 | 116.5 | 1.18 | 2.51 | 9.22  | 1.17 | 0.02 | 0.37 | 58.13 | 0.01 | 8.45  | 4.07  | 18.51 | 0.01 | 0.01 | 0.01 | 0.02 |

Mean elevation (ME) (m asl), maximum relief (MED) (m), mean slope (MS) (%), drainage density (DD) (km·km<sup>-2</sup>), land use characteristics (%) - urban fabric (UF), industrial, commercial and transport units (ICT), mine, dump and construction sites (MDC), artificial, non-agricultural vegetated areas (AnA), arable land (AL), permanent crops (PC), pastures (P), heterogeneous agricultural (HA), forests (F), scrub and/or herbaceous vegetation associations areas (AHV), open spaces with little or no vegetation (OS), wetlands (WE) and waters (WA).

**Table S2.** The results of trend analysis for the period 1950 – 2020 - Ner (ND), Mała Noteć (MG), Grabia (GG), Widawka (WR), Niesób (NK), Prosna (PB), Mogilnica (MK), Sama (SS), Drawa (DD), Oleśnica (ON), Wełna (WP), Gwda (GP), Flinta (FR) and Ołobok (OO).

| ND   | S    | Tau    | Z-Value | P-value | Sen's Slope | MG   | S     | Tau    | Z-Value | P-value | Sen's Slope |
|------|------|--------|---------|---------|-------------|------|-------|--------|---------|---------|-------------|
| NovL | -106 | -0.045 | -0.544  | 0.5865  | -0.009      | NovL | -854  | -0.364 | -4.418  | 0.0000  | -0.006      |
| DecL | -46  | -0.020 | -0.233  | 0.8157  | -0.004      | DecL | -832  | -0.355 | -4.304  | 0.0000  | -0.007      |
| JanL | 412  | 0.176  | 2.129   | 0.0333  | 0.039       | JanL | -780  | -0.332 | -4.035  | 0.0001  | -0.005      |
| FebL | 390  | 0.166  | 2.015   | 0.0439  | 0.045       | FebL | -718  | -0.306 | -3.714  | 0.0002  | -0.007      |
| MarL | 296  | 0.126  | 1.528   | 0.1265  | 0.034       | MarL | -716  | -0.305 | -3.703  | 0.0002  | -0.008      |
| AprL | -80  | -0.034 | -0.409  | 0.6824  | -0.006      | AprL | -864  | -0.368 | -4.470  | 0.0000  | -0.008      |
| MayL | -162 | -0.069 | -0.834  | 0.4043  | -0.012      | MayL | -1056 | -0.450 | -5.464  | 0.0000  | -0.006      |
| JunL | -302 | -0.129 | -1.559  | 0.1190  | -0.020      | JunL | -902  | -0.384 | -4.667  | 0.0000  | -0.004      |
| JulL | 196  | 0.084  | 1.010   | 0.3125  | 0.009       | JulL | -888  | -0.379 | -4.594  | 0.0000  | -0.003      |
| AugL | -184 | -0.078 | -0.948  | 0.3432  | -0.008      | AugL | -976  | -0.416 | -5.050  | 0.0000  | -0.004      |
| SepL | -286 | -0.122 | -1.476  | 0.1399  | -0.017      | SepL | -1002 | -0.427 | -5.185  | 0.0000  | -0.005      |
| OctL | -92  | -0.039 | -0.471  | 0.6374  | -0.006      | OctL | -1056 | -0.450 | -5.464  | 0.0000  | -0.005      |
| WHL  | 214  | 0.091  | 1.103   | 0.2699  | 0.012       | WHL  | -906  | -0.386 | -4.687  | 0.0000  | -0.006      |
| SHL  | -70  | -0.030 | -0.357  | 0.7208  | -0.002      | SHL  | -1022 | -0.436 | -5.288  | 0.0000  | -0.003      |
| YL   | -28  | -0.012 | -0.140  | 0.8888  | -0.001      | YL   | -1052 | -0.448 | -5.444  | 0.0000  | -0.003      |
| NovM | -224 | -0.095 | -1.155  | 0.2481  | -0.028      | NovM | -762  | -0.325 | -3.942  | 0.0001  | -0.007      |
| DecM | -168 | -0.072 | -0.865  | 0.3871  | -0.026      | DecM | -874  | -0.373 | -4.522  | 0.0000  | -0.009      |
| JanM | 96   | 0.041  | 0.492   | 0.6227  | 0.019       | JanM | -702  | -0.299 | -3.631  | 0.0003  | -0.007      |
| FebM | 40   | 0.017  | 0.202   | 0.8399  | 0.008       | FebM | -710  | -0.303 | -3.672  | 0.0002  | -0.009      |
| MarM | -68  | -0.029 | -0.347  | 0.7286  | -0.012      | MarM | -776  | -0.331 | -4.014  | 0.0001  | -0.011      |
| AprM | -98  | -0.042 | -0.502  | 0.6154  | -0.014      | AprM | -810  | -0.345 | -4.190  | 0.0000  | -0.010      |
| MayM | -28  | -0.012 | -0.140  | 0.8888  | -0.004      | MayM | -962  | -0.410 | -4.978  | 0.0000  | -0.008      |
| JunM | -324 | -0.138 | -1.673  | 0.0943  | -0.025      | JunM | -900  | -0.384 | -4.656  | 0.0000  | -0.005      |
| JulM | -16  | -0.007 | -0.078  | 0.9381  | -0.002      | JulM | -808  | -0.344 | -4.180  | 0.0000  | -0.004      |

|       |      |        |        |        |        |       |       |        |        |        |        |
|-------|------|--------|--------|--------|--------|-------|-------|--------|--------|--------|--------|
| AugM  | -232 | -0.099 | -1.196 | 0.2315 | -0.017 | AugM  | -858  | -0.366 | -4.439 | 0.0000 | -0.005 |
| SepM  | -108 | -0.046 | -0.554 | 0.5794 | -0.009 | SepM  | -952  | -0.406 | -4.926 | 0.0000 | -0.006 |
| OctM  | -38  | -0.016 | -0.192 | 0.8480 | -0.004 | OctM  | -960  | -0.409 | -4.967 | 0.0000 | -0.007 |
| WHM   | -100 | -0.043 | -0.513 | 0.6081 | -0.016 | WHM   | -822  | -0.350 | -4.252 | 0.0000 | -0.009 |
| SHM   | -300 | -0.128 | -1.549 | 0.1215 | -0.027 | SHM   | -1144 | -0.488 | -5.920 | 0.0000 | -0.007 |
| YM    | -164 | -0.070 | -0.844 | 0.3985 | -0.017 | YM    | -952  | -0.406 | -4.926 | 0.0000 | -0.008 |
| NovH  | -290 | -0.124 | -1.497 | 0.1344 | -0.053 | NovH  | -708  | -0.302 | -3.662 | 0.0003 | -0.008 |
| DecH  | -218 | -0.093 | -1.124 | 0.2610 | -0.047 | DecH  | -908  | -0.387 | -4.698 | 0.0000 | -0.011 |
| JanH  | 12   | 0.005  | 0.057  | 0.9546 | 0.003  | JanH  | -666  | -0.284 | -3.444 | 0.0006 | -0.009 |
| FebH  | -74  | -0.032 | -0.378 | 0.7054 | -0.029 | FebH  | -738  | -0.315 | -3.817 | 0.0001 | -0.012 |
| MarH  | -454 | -0.194 | -2.346 | 0.0190 | -0.156 | MarH  | -730  | -0.311 | -3.776 | 0.0002 | -0.013 |
| AprH  | -162 | -0.069 | -0.834 | 0.4043 | -0.040 | AprH  | -694  | -0.296 | -3.589 | 0.0003 | -0.011 |
| MayH  | 166  | 0.071  | 0.855  | 0.3928 | 0.036  | MayH  | -860  | -0.367 | -4.449 | 0.0000 | -0.011 |
| JunH  | 8    | 0.003  | 0.036  | 0.9711 | 0.002  | JunH  | -814  | -0.347 | -4.211 | 0.0000 | -0.006 |
| JulH  | -54  | -0.023 | -0.275 | 0.7837 | -0.011 | JulH  | -796  | -0.339 | -4.118 | 0.0000 | -0.006 |
| AugH  | -160 | -0.068 | -0.824 | 0.4102 | -0.024 | AugH  | -764  | -0.326 | -3.952 | 0.0001 | -0.006 |
| SepH  | -26  | -0.011 | -0.129 | 0.8970 | -0.004 | SepH  | -888  | -0.379 | -4.594 | 0.0000 | -0.007 |
| OctH  | 120  | 0.051  | 0.616  | 0.5377 | 0.016  | OctH  | -884  | -0.377 | -4.574 | 0.0000 | -0.008 |
| WHH   | -544 | -0.232 | -2.812 | 0.0049 | -0.253 | WHH   | -670  | -0.286 | -3.465 | 0.0005 | -0.014 |
| SHH   | -200 | -0.085 | -1.031 | 0.3027 | -0.052 | SHH   | -944  | -0.402 | -4.884 | 0.0000 | -0.012 |
| YH    | -618 | -0.263 | -3.196 | 0.0014 | -0.361 | YH    | -642  | -0.274 | -3.320 | 0.0009 | -0.014 |
| DL3   | -24  | -0.010 | -0.119 | 0.9052 | -0.001 | DL3   | -1064 | -0.454 | -5.506 | 0.0000 | -0.003 |
| DL7   | -56  | -0.024 | -0.285 | 0.7757 | -0.003 | DL7   | -1058 | -0.451 | -5.475 | 0.0000 | -0.003 |
| DL30  | -28  | -0.012 | -0.140 | 0.8888 | -0.001 | DL30  | -1090 | -0.465 | -5.640 | 0.0000 | -0.004 |
| DL90  | -34  | -0.014 | -0.171 | 0.8643 | -0.001 | DL90  | -1144 | -0.488 | -5.920 | 0.0000 | -0.005 |
| TBQ30 | 70   | 0.030  | 0.357  | 0.7208 | 0.191  | TBQ30 | 1032  | 0.440  | 5.340  | 0.0000 | 2.742  |
| TBQ50 | 202  | 0.086  | 1.041  | 0.2978 | 0.411  | TBQ50 | 1170  | 0.499  | 6.055  | 0.0000 | 3.489  |
| TBQ70 | 206  | 0.088  | 1.062  | 0.2883 | 0.462  | TBQ70 | 1226  | 0.523  | 6.345  | 0.0000 | 3.187  |
| TBQ90 | 58   | 0.025  | 0.295  | 0.7677 | 0.033  | TBQ90 | 1070  | 0.456  | 5.537  | 0.0000 | 0.832  |

|        |     |        |        |        |        |        |     |       |       |        |       |
|--------|-----|--------|--------|--------|--------|--------|-----|-------|-------|--------|-------|
| TQ3090 | 36  | 0.015  | 0.181  | 0.8561 | 0.116  | TQ3090 | 528 | 0.225 | 2.730 | 0.0063 | 1.239 |
| TQ5090 | -12 | -0.005 | -0.057 | 0.9546 | -0.012 | TQ5090 | 870 | 0.371 | 4.501 | 0.0000 | 2.001 |

| GG   | S    | Tau    | Z-Value | P-value | Sen's Slope | WR   | S    | Tau    | Z-Value | P-value | Sen's Slope |
|------|------|--------|---------|---------|-------------|------|------|--------|---------|---------|-------------|
| NovL | 28   | 0.012  | 0.140   | 0.8888  | 0.001       | NovL | 776  | 0.331  | 4.014   | 0.0001  | 0.052       |
| DecL | -52  | -0.022 | -0.264  | 0.7917  | -0.003      | DecL | 818  | 0.349  | 4.232   | 0.0000  | 0.057       |
| JanL | 192  | 0.082  | 0.989   | 0.3225  | 0.008       | JanL | 1016 | 0.433  | 5.257   | 0.0000  | 0.064       |
| FebL | 88   | 0.038  | 0.451   | 0.6523  | 0.003       | FebL | 638  | 0.272  | 3.299   | 0.0010  | 0.047       |
| MarL | 226  | 0.096  | 1.165   | 0.2439  | 0.011       | MarL | 872  | 0.372  | 4.511   | 0.0000  | 0.048       |
| AprL | -58  | -0.025 | -0.295  | 0.7678  | -0.002      | AprL | 880  | 0.375  | 4.553   | 0.0000  | 0.048       |
| MayL | -186 | -0.079 | -0.958  | 0.3380  | -0.005      | MayL | 824  | 0.351  | 4.263   | 0.0000  | 0.055       |
| JunL | -420 | -0.179 | -2.170  | 0.0300  | -0.007      | JunL | 1018 | 0.434  | 5.268   | 0.0000  | 0.059       |
| JulL | -314 | -0.134 | -1.621  | 0.1050  | -0.006      | JulL | 1140 | 0.486  | 5.899   | 0.0000  | 0.058       |
| AugL | -544 | -0.232 | -2.812  | 0.0049  | -0.009      | AugL | 954  | 0.407  | 4.936   | 0.0000  | 0.054       |
| SepL | -488 | -0.208 | -2.522  | 0.0117  | -0.008      | SepL | 1032 | 0.440  | 5.340   | 0.0000  | 0.050       |
| OctL | -350 | -0.149 | -1.808  | 0.0707  | -0.008      | OctL | 724  | 0.309  | 3.745   | 0.0002  | 0.045       |
| WHL  | 136  | 0.058  | 0.699   | 0.4844  | 0.003       | WHL  | 1308 | 0.558  | 6.770   | 0.0000  | 0.072       |
| SHL  | -464 | -0.198 | -2.398  | 0.0165  | -0.007      | SHL  | 1350 | 0.575  | 6.987   | 0.0000  | 0.060       |
| YL   | -432 | -0.184 | -2.232  | 0.0256  | -0.005      | YL   | 1396 | 0.595  | 7.225   | 0.0000  | 0.062       |
| NovM | -186 | -0.079 | -0.958  | 0.3380  | -0.008      | NovM | 422  | 0.180  | 2.181   | 0.0292  | 0.033       |
| DecM | -92  | -0.039 | -0.471  | 0.6374  | -0.008      | DecM | 208  | 0.089  | 1.072   | 0.2836  | 0.016       |
| JanM | 52   | 0.022  | 0.264   | 0.7917  | 0.003       | JanM | 192  | 0.082  | 0.989   | 0.3225  | 0.017       |
| FebM | -22  | -0.009 | -0.109  | 0.9134  | -0.003      | FebM | -118 | -0.050 | -0.606  | 0.5445  | -0.016      |
| MarM | -10  | -0.004 | -0.047  | 0.9628  | -0.001      | MarM | -176 | -0.075 | -0.906  | 0.3647  | -0.020      |
| AprM | -68  | -0.029 | -0.347  | 0.7286  | -0.004      | AprM | 38   | 0.016  | 0.192   | 0.8480  | 0.005       |
| MayM | 2    | 0.001  | 0.005   | 0.9959  | 0.000       | MayM | 480  | 0.205  | 2.481   | 0.0131  | 0.042       |
| JunM | -376 | -0.160 | -1.942  | 0.0521  | -0.013      | JunM | 562  | 0.240  | 2.906   | 0.0037  | 0.047       |
| JulM | -340 | -0.145 | -1.756  | 0.0791  | -0.012      | JulM | 354  | 0.151  | 1.828   | 0.0675  | 0.029       |
| AugM | -378 | -0.161 | -1.953  | 0.0509  | -0.010      | AugM | 542  | 0.231  | 2.802   | 0.0051  | 0.049       |

|        |      |        |        |        |        |        |       |        |        |        |        |
|--------|------|--------|--------|--------|--------|--------|-------|--------|--------|--------|--------|
| SepM   | -440 | -0.188 | -2.274 | 0.0230 | -0.012 | SepM   | 576   | 0.246  | 2.978  | 0.0029 | 0.037  |
| OctM   | -190 | -0.081 | -0.979 | 0.3276 | -0.006 | OctM   | 538   | 0.229  | 2.781  | 0.0054 | 0.038  |
| WHM    | -76  | -0.032 | -0.388 | 0.6977 | -0.006 | WHM    | -44   | -0.019 | -0.223 | 0.8238 | -0.004 |
| SHM    | -306 | -0.130 | -1.580 | 0.1142 | -0.011 | SHM    | 506   | 0.216  | 2.616  | 0.0089 | 0.031  |
| YM     | -178 | -0.076 | -0.917 | 0.3593 | -0.009 | YM     | 162   | 0.069  | 0.834  | 0.4043 | 0.008  |
| NovH   | -268 | -0.114 | -1.383 | 0.1667 | -0.020 | NovH   | -92   | -0.039 | -0.471 | 0.6374 | -0.012 |
| DecH   | -286 | -0.122 | -1.476 | 0.1399 | -0.036 | DecH   | -360  | -0.153 | -1.859 | 0.0630 | -0.057 |
| JanH   | -154 | -0.066 | -0.792 | 0.4281 | -0.030 | JanH   | -148  | -0.063 | -0.761 | 0.4464 | -0.031 |
| FebH   | -88  | -0.038 | -0.451 | 0.6523 | -0.023 | FebH   | -432  | -0.184 | -2.232 | 0.0256 | -0.131 |
| MarH   | -286 | -0.122 | -1.476 | 0.1399 | -0.077 | MarH   | -630  | -0.269 | -3.258 | 0.0011 | -0.192 |
| AprH   | -82  | -0.035 | -0.420 | 0.6748 | -0.012 | AprH   | -410  | -0.175 | -2.118 | 0.0341 | -0.088 |
| MayH   | 152  | 0.065  | 0.782  | 0.4342 | 0.017  | MayH   | 186   | 0.079  | 0.958  | 0.3380 | 0.025  |
| JunH   | -248 | -0.106 | -1.279 | 0.2008 | -0.018 | JunH   | 196   | 0.084  | 1.010  | 0.3125 | 0.023  |
| JulH   | -316 | -0.135 | -1.632 | 0.1028 | -0.016 | JulH   | -56   | -0.024 | -0.285 | 0.7757 | -0.010 |
| AugH   | -298 | -0.127 | -1.538 | 0.1240 | -0.012 | AugH   | 308   | 0.131  | 1.590  | 0.1118 | 0.033  |
| SepH   | -380 | -0.162 | -1.963 | 0.0496 | -0.015 | SepH   | 134   | 0.057  | 0.689  | 0.4909 | 0.014  |
| OctH   | -126 | -0.054 | -0.647 | 0.5173 | -0.006 | OctH   | 318   | 0.136  | 1.642  | 0.1006 | 0.034  |
| WHH    | -460 | -0.196 | -2.377 | 0.0174 | -0.194 | WHH    | -1076 | -0.459 | -5.568 | 0.0000 | -0.570 |
| SHH    | -186 | -0.079 | -0.958 | 0.3380 | -0.034 | SHH    | -308  | -0.131 | -1.590 | 0.1118 | -0.080 |
| YH     | -456 | -0.194 | -2.357 | 0.0184 | -0.233 | YH     | -1056 | -0.450 | -5.464 | 0.0000 | -0.672 |
| DL3    | -414 | -0.176 | -2.139 | 0.0324 | -0.005 | DL3    | 1372  | 0.585  | 7.101  | 0.0000 | 0.062  |
| DL7    | -418 | -0.178 | -2.160 | 0.0308 | -0.006 | DL7    | 1348  | 0.575  | 6.977  | 0.0000 | 0.061  |
| DL30   | -468 | -0.199 | -2.419 | 0.0156 | -0.007 | DL30   | 1352  | 0.576  | 6.998  | 0.0000 | 0.060  |
| DL90   | -448 | -0.191 | -2.315 | 0.0206 | -0.007 | DL90   | 1276  | 0.544  | 6.604  | 0.0000 | 0.055  |
| TBQ30  | 182  | 0.078  | 0.937  | 0.3485 | 0.375  | TBQ30  | -44   | -0.019 | -0.223 | 0.8238 | -0.065 |
| TBQ50  | 292  | 0.124  | 1.507  | 0.1317 | 0.665  | TBQ50  | -604  | -0.257 | -3.123 | 0.0018 | -1.403 |
| TBQ70  | 286  | 0.122  | 1.476  | 0.1399 | 0.682  | TBQ70  | -1048 | -0.447 | -5.423 | 0.0000 | -2.205 |
| TBQ90  | 92   | 0.039  | 0.480  | 0.6316 | 0.000  | TBQ90  | -1586 | -0.676 | -8.210 | 0.0000 | -0.789 |
| TQ3090 | 216  | 0.092  | 1.114  | 0.2655 | 0.323  | TQ3090 | 1022  | 0.436  | 5.288  | 0.0000 | 2.079  |

|        |     |       |       |        |       |        |     |       |       |        |       |
|--------|-----|-------|-------|--------|-------|--------|-----|-------|-------|--------|-------|
| TQ5090 | 254 | 0.108 | 1.310 | 0.1901 | 0.439 | TQ5090 | 420 | 0.179 | 2.170 | 0.0300 | 0.943 |
|--------|-----|-------|-------|--------|-------|--------|-----|-------|-------|--------|-------|

| NK   | S    | Tau    | Z-Value | P-value | Sen's Slope | PB   | S    | Tau    | Z-Value | P-value | Sen's Slope |
|------|------|--------|---------|---------|-------------|------|------|--------|---------|---------|-------------|
| NovL | 84   | 0.036  | 0.430   | 0.6673  | 0.001       | NovL | -78  | -0.033 | -0.399  | 0.6900  | -0.010      |
| DecL | 168  | 0.072  | 0.865   | 0.3871  | 0.001       | DecL | -50  | -0.021 | -0.254  | 0.7997  | -0.010      |
| JanL | 338  | 0.144  | 1.745   | 0.0809  | 0.003       | JanL | 16   | 0.007  | 0.078   | 0.9381  | 0.005       |
| FebL | 252  | 0.107  | 1.300   | 0.1936  | 0.003       | FebL | 122  | 0.052  | 0.627   | 0.5308  | 0.022       |
| MarL | 430  | 0.183  | 2.222   | 0.0263  | 0.004       | MarL | 32   | 0.014  | 0.161   | 0.8724  | 0.006       |
| AprL | 46   | 0.020  | 0.233   | 0.8157  | 0.000       | AprL | -332 | -0.142 | -1.714  | 0.0865  | -0.042      |
| MayL | -60  | -0.026 | -0.306  | 0.7599  | 0.000       | MayL | -250 | -0.107 | -1.290  | 0.1972  | -0.019      |
| JunL | 612  | 0.261  | 3.165   | 0.0016  | 0.003       | JunL | -130 | -0.055 | -0.668  | 0.5040  | -0.009      |
| JulL | 666  | 0.284  | 3.444   | 0.0006  | 0.003       | JulL | -72  | -0.031 | -0.368  | 0.7131  | -0.003      |
| AugL | 226  | 0.096  | 1.165   | 0.2439  | 0.001       | AugL | -320 | -0.136 | -1.652  | 0.0985  | -0.018      |
| SepL | 264  | 0.113  | 1.362   | 0.1731  | 0.002       | SepL | -308 | -0.131 | -1.590  | 0.1118  | -0.021      |
| OctL | 110  | 0.047  | 0.565   | 0.5724  | 0.001       | OctL | -400 | -0.171 | -2.067  | 0.0388  | -0.038      |
| WHL  | 300  | 0.128  | 1.549   | 0.1215  | 0.001       | WHL  | 158  | 0.067  | 0.813   | 0.4161  | 0.011       |
| SHL  | 588  | 0.251  | 3.040   | 0.0024  | 0.002       | SHL  | -178 | -0.076 | -0.917  | 0.3593  | -0.009      |
| YL   | 588  | 0.251  | 3.040   | 0.0024  | 0.002       | YL   | -184 | -0.078 | -0.948  | 0.3432  | -0.009      |
| NovM | -162 | -0.069 | -0.834  | 0.4043  | -0.002      | NovM | -126 | -0.054 | -0.647  | 0.5173  | -0.023      |
| DecM | 2    | 0.001  | 0.005   | 0.9959  | 0.000       | DecM | -214 | -0.091 | -1.103  | 0.2699  | -0.054      |
| JanM | 118  | 0.050  | 0.606   | 0.5445  | 0.002       | JanM | 10   | 0.004  | 0.047   | 0.9628  | 0.004       |
| FebM | 50   | 0.021  | 0.254   | 0.7997  | 0.001       | FebM | -66  | -0.028 | -0.337  | 0.7364  | -0.023      |
| MarM | -62  | -0.026 | -0.316  | 0.7520  | -0.001      | MarM | -212 | -0.090 | -1.093  | 0.2744  | -0.082      |
| AprM | -150 | -0.064 | -0.772  | 0.4403  | -0.002      | AprM | -332 | -0.142 | -1.714  | 0.0865  | -0.085      |
| MayM | -112 | -0.048 | -0.575  | 0.5653  | -0.001      | MayM | -200 | -0.085 | -1.031  | 0.3027  | -0.033      |
| JunM | 130  | 0.055  | 0.668   | 0.5040  | 0.001       | JunM | -308 | -0.131 | -1.590  | 0.1118  | -0.038      |
| JulM | 30   | 0.013  | 0.150   | 0.8806  | 0.000       | JulM | -378 | -0.161 | -1.953  | 0.0509  | -0.050      |
| AugM | 132  | 0.056  | 0.679   | 0.4974  | 0.001       | AugM | -412 | -0.176 | -2.129  | 0.0333  | -0.043      |
| SepM | 128  | 0.055  | 0.658   | 0.5107  | 0.001       | SepM | -234 | -0.100 | -1.207  | 0.2275  | -0.030      |

|        |      |        |        |        |        |        |      |        |        |        |        |
|--------|------|--------|--------|--------|--------|--------|------|--------|--------|--------|--------|
| OctM   | -14  | -0.006 | -0.067 | 0.9463 | 0.000  | OctM   | -136 | -0.058 | -0.699 | 0.4844 | -0.021 |
| WHM    | -100 | -0.043 | -0.513 | 0.6081 | -0.002 | WHM    | -238 | -0.101 | -1.228 | 0.2196 | -0.055 |
| SHM    | -26  | -0.011 | -0.129 | 0.8970 | 0.000  | SHM    | -356 | -0.152 | -1.839 | 0.0660 | -0.047 |
| YM     | -40  | -0.017 | -0.202 | 0.8399 | 0.000  | YM     | -254 | -0.108 | -1.310 | 0.1901 | -0.044 |
| NovH   | -252 | -0.107 | -1.300 | 0.1936 | -0.006 | NovH   | -200 | -0.085 | -1.031 | 0.3027 | -0.066 |
| DecH   | -140 | -0.060 | -0.720 | 0.4716 | -0.004 | DecH   | -294 | -0.125 | -1.518 | 0.1291 | -0.139 |
| JanH   | 26   | 0.011  | 0.129  | 0.8970 | 0.002  | JanH   | -88  | -0.038 | -0.451 | 0.6523 | -0.053 |
| FebH   | 28   | 0.012  | 0.140  | 0.8888 | 0.002  | FebH   | -164 | -0.070 | -0.844 | 0.3985 | -0.128 |
| MarH   | -316 | -0.135 | -1.632 | 0.1028 | -0.020 | MarH   | -394 | -0.168 | -2.036 | 0.0418 | -0.306 |
| AprH   | -154 | -0.066 | -0.792 | 0.4281 | -0.005 | AprH   | -278 | -0.118 | -1.435 | 0.1514 | -0.147 |
| MayH   | -154 | -0.066 | -0.792 | 0.4281 | -0.004 | MayH   | -92  | -0.039 | -0.471 | 0.6374 | -0.045 |
| JunH   | 96   | 0.041  | 0.492  | 0.6227 | 0.002  | JunH   | -240 | -0.102 | -1.238 | 0.2158 | -0.060 |
| JulH   | -194 | -0.083 | -1.000 | 0.3175 | -0.004 | JulH   | -518 | -0.221 | -2.678 | 0.0074 | -0.121 |
| AugH   | -44  | -0.019 | -0.223 | 0.8238 | -0.001 | AugH   | -414 | -0.176 | -2.139 | 0.0324 | -0.083 |
| SepH   | 86   | 0.037  | 0.440  | 0.6597 | 0.001  | SepH   | -214 | -0.091 | -1.103 | 0.2699 | -0.051 |
| OctH   | -122 | -0.052 | -0.627 | 0.5308 | -0.002 | OctH   | -66  | -0.028 | -0.337 | 0.7364 | -0.015 |
| WHH    | -504 | -0.215 | -2.605 | 0.0092 | -0.048 | WHH    | -590 | -0.251 | -3.051 | 0.0023 | -0.658 |
| SHH    | -394 | -0.168 | -2.036 | 0.0418 | -0.019 | SHH    | -262 | -0.112 | -1.352 | 0.1764 | -0.161 |
| YH     | -446 | -0.190 | -2.305 | 0.0212 | -0.042 | YH     | -478 | -0.204 | -2.471 | 0.0135 | -0.562 |
| DL3    | 594  | 0.253  | 3.071  | 0.0021 | 0.002  | DL3    | -176 | -0.075 | -0.906 | 0.3647 | -0.008 |
| DL7    | 568  | 0.242  | 2.937  | 0.0033 | 0.002  | DL7    | -202 | -0.086 | -1.041 | 0.2978 | -0.009 |
| DL30   | 514  | 0.219  | 2.657  | 0.0079 | 0.002  | DL30   | -230 | -0.098 | -1.186 | 0.2356 | -0.013 |
| DL90   | 336  | 0.143  | 1.735  | 0.0827 | 0.002  | DL90   | -232 | -0.099 | -1.196 | 0.2315 | -0.016 |
| TBQ30  | 98   | 0.042  | 0.502  | 0.6154 | 0.166  | TBQ30  | 218  | 0.093  | 1.124  | 0.2610 | 0.426  |
| TBQ50  | 94   | 0.040  | 0.482  | 0.6300 | 0.142  | TBQ50  | 324  | 0.138  | 1.673  | 0.0943 | 0.707  |
| TBQ70  | -28  | -0.012 | -0.140 | 0.8888 | -0.043 | TBQ70  | 310  | 0.132  | 1.600  | 0.1095 | 0.621  |
| TBQ90  | -115 | -0.049 | -0.597 | 0.5505 | 0.000  | TBQ90  | 217  | 0.092  | 1.119  | 0.2631 | 0.154  |
| TQ3090 | 316  | 0.135  | 1.632  | 0.1028 | 0.519  | TQ3090 | -46  | -0.020 | -0.233 | 0.8157 | -0.053 |
| TQ5090 | 230  | 0.098  | 1.186  | 0.2356 | 0.391  | TQ5090 | 60   | 0.026  | 0.306  | 0.7599 | 0.094  |

| MK   | S    | Tau    | Z-Value | P-value | Sen's Slope | SS   | S    | Tau    | Z-Value | P-value | Sen's Slope |
|------|------|--------|---------|---------|-------------|------|------|--------|---------|---------|-------------|
| NovL | -62  | -0.026 | -0.316  | 0.7520  | -0.001      | NovL | -390 | -0.166 | -2.015  | 0.0439  | -0.003      |
| DecL | 50   | 0.021  | 0.254   | 0.7997  | 0.001       | DecL | -154 | -0.066 | -0.792  | 0.4281  | -0.002      |
| JanL | 272  | 0.116  | 1.404   | 0.1604  | 0.005       | JanL | -136 | -0.058 | -0.699  | 0.4844  | -0.002      |
| FebL | 266  | 0.113  | 1.373   | 0.1699  | 0.006       | FebL | -38  | -0.016 | -0.192  | 0.8480  | -0.001      |
| MarL | 242  | 0.103  | 1.248   | 0.2119  | 0.009       | MarL | 80   | 0.034  | 0.409   | 0.6824  | 0.001       |
| AprL | -96  | -0.041 | -0.492  | 0.6227  | -0.002      | AprL | -276 | -0.118 | -1.424  | 0.1543  | -0.004      |
| MayL | -382 | -0.163 | -1.973  | 0.0485  | -0.003      | MayL | -402 | -0.171 | -2.077  | 0.0378  | -0.003      |
| JunL | -128 | -0.055 | -0.658  | 0.5107  | -0.001      | JunL | -416 | -0.177 | -2.149  | 0.0316  | -0.002      |
| JulL | -48  | -0.020 | -0.243  | 0.8077  | 0.000       | JulL | -240 | -0.102 | -1.238  | 0.2158  | -0.001      |
| AugL | -132 | -0.056 | -0.679  | 0.4974  | -0.001      | AugL | -286 | -0.122 | -1.476  | 0.1399  | -0.001      |
| SepL | -148 | -0.063 | -0.761  | 0.4464  | -0.001      | SepL | -208 | -0.089 | -1.072  | 0.2836  | -0.001      |
| OctL | -164 | -0.070 | -0.844  | 0.3985  | -0.001      | OctL | -430 | -0.183 | -2.222  | 0.0263  | -0.002      |
| WHL  | -39  | -0.017 | -0.197  | 0.8440  | 0.000       | WHL  | -314 | -0.134 | -1.621  | 0.1050  | -0.002      |
| SHL  | -148 | -0.063 | -0.761  | 0.4464  | 0.000       | SHL  | -387 | -0.165 | -1.999  | 0.0456  | -0.001      |
| YL   | -194 | -0.083 | -1.000  | 0.3175  | -0.001      | YL   | -392 | -0.167 | -2.025  | 0.0428  | -0.001      |
| NovM | -20  | -0.009 | -0.098  | 0.9216  | 0.000       | NovM | -178 | -0.076 | -0.917  | 0.3593  | -0.002      |
| DecM | -50  | -0.021 | -0.254  | 0.7997  | -0.002      | DecM | -138 | -0.059 | -0.710  | 0.4780  | -0.003      |
| JanM | 134  | 0.057  | 0.689   | 0.4909  | 0.006       | JanM | -75  | -0.032 | -0.383  | 0.7015  | -0.002      |
| FebM | 94   | 0.040  | 0.482   | 0.6300  | 0.005       | FebM | -118 | -0.050 | -0.606  | 0.5445  | -0.004      |
| MarM | -28  | -0.012 | -0.140  | 0.8888  | -0.001      | MarM | -68  | -0.029 | -0.347  | 0.7286  | -0.002      |
| AprM | -102 | -0.043 | -0.523  | 0.6009  | -0.004      | AprM | -210 | -0.090 | -1.083  | 0.2790  | -0.006      |
| MayM | -358 | -0.153 | -1.849  | 0.0644  | -0.008      | MayM | -360 | -0.153 | -1.859  | 0.0630  | -0.005      |
| JunM | -138 | -0.059 | -0.710  | 0.4780  | -0.001      | JunM | -416 | -0.177 | -2.149  | 0.0316  | -0.003      |
| JulM | -32  | -0.014 | -0.161  | 0.8724  | 0.000       | JulM | -106 | -0.045 | -0.544  | 0.5865  | -0.001      |
| AugM | -60  | -0.026 | -0.306  | 0.7599  | 0.000       | AugM | -170 | -0.072 | -0.875  | 0.3814  | -0.001      |
| SepM | -200 | -0.085 | -1.031  | 0.3027  | -0.001      | SepM | -252 | -0.107 | -1.300  | 0.1936  | -0.001      |
| OctM | -154 | -0.066 | -0.792  | 0.4281  | -0.001      | OctM | -404 | -0.172 | -2.087  | 0.0369  | -0.002      |



|        |      |        |        |        |        |        |      |        |        |        |        |
|--------|------|--------|--------|--------|--------|--------|------|--------|--------|--------|--------|
| WHM    | -64  | -0.027 | -0.326 | 0.7442 | -0.002 | WHM    | -158 | -0.067 | -0.813 | 0.4161 | -0.004 |
| SHM    | -202 | -0.086 | -1.041 | 0.2978 | -0.002 | SHM    | -270 | -0.115 | -1.393 | 0.1635 | -0.002 |
| YM     | -56  | -0.024 | -0.285 | 0.7757 | -0.002 | YM     | -196 | -0.084 | -1.010 | 0.3125 | -0.003 |
| NovH   | -86  | -0.037 | -0.440 | 0.6597 | -0.003 | NovH   | -116 | -0.049 | -0.596 | 0.5514 | -0.002 |
| DecH   | -94  | -0.040 | -0.482 | 0.6300 | -0.005 | DecH   | -110 | -0.047 | -0.565 | 0.5724 | -0.002 |
| JanH   | 18   | 0.008  | 0.088  | 0.9298 | 0.002  | JanH   | -106 | -0.045 | -0.544 | 0.5865 | -0.004 |
| FebH   | 80   | 0.034  | 0.409  | 0.6824 | 0.007  | FebH   | -126 | -0.054 | -0.647 | 0.5173 | -0.008 |
| MarH   | -218 | -0.093 | -1.124 | 0.2610 | -0.020 | MarH   | -252 | -0.107 | -1.300 | 0.1936 | -0.012 |
| AprH   | -80  | -0.034 | -0.409 | 0.6824 | -0.006 | AprH   | -194 | -0.083 | -1.000 | 0.3175 | -0.006 |
| MayH   | -326 | -0.139 | -1.683 | 0.0923 | -0.014 | MayH   | -288 | -0.123 | -1.487 | 0.1371 | -0.008 |
| JunH   | -244 | -0.104 | -1.259 | 0.2082 | -0.004 | JunH   | -272 | -0.116 | -1.404 | 0.1604 | -0.003 |
| JulH   | -6   | -0.003 | -0.026 | 0.9793 | 0.000  | JulH   | -66  | -0.028 | -0.337 | 0.7364 | -0.001 |
| AugH   | 8    | 0.003  | 0.036  | 0.9711 | 0.000  | AugH   | -62  | -0.026 | -0.316 | 0.7520 | -0.001 |
| SepH   | -242 | -0.103 | -1.248 | 0.2119 | -0.003 | SepH   | -172 | -0.073 | -0.886 | 0.3758 | -0.001 |
| OctH   | -104 | -0.044 | -0.533 | 0.5937 | -0.001 | OctH   | -430 | -0.183 | -2.222 | 0.0263 | -0.004 |
| WHH    | -206 | -0.088 | -1.062 | 0.2883 | -0.028 | WHH    | -240 | -0.102 | -1.238 | 0.2158 | -0.016 |
| SHH    | -100 | -0.043 | -0.513 | 0.6081 | -0.005 | SHH    | -84  | -0.036 | -0.430 | 0.6673 | -0.004 |
| YH     | -210 | -0.090 | -1.083 | 0.2790 | -0.027 | YH     | -222 | -0.095 | -1.145 | 0.2523 | -0.020 |
| DL3    | -208 | -0.089 | -1.072 | 0.2836 | -0.001 | DL3    | -376 | -0.160 | -1.942 | 0.0521 | -0.001 |
| DL7    | -198 | -0.084 | -1.020 | 0.3076 | -0.001 | DL7    | -388 | -0.165 | -2.004 | 0.0450 | -0.001 |
| DL30   | -130 | -0.055 | -0.668 | 0.5040 | -0.001 | DL30   | -334 | -0.142 | -1.725 | 0.0846 | -0.001 |
| DL90   | -120 | -0.051 | -0.616 | 0.5377 | -0.001 | DL90   | -358 | -0.153 | -1.849 | 0.0644 | -0.001 |
| TBQ30  | 38   | 0.016  | 0.192  | 0.8480 | 0.070  | TBQ30  | 146  | 0.062  | 0.751  | 0.4526 | 0.308  |
| TBQ50  | 82   | 0.035  | 0.420  | 0.6748 | 0.184  | TBQ50  | 286  | 0.122  | 1.476  | 0.1399 | 0.792  |
| TBQ70  | 110  | 0.047  | 0.565  | 0.5724 | 0.281  | TBQ70  | 372  | 0.159  | 1.922  | 0.0547 | 0.799  |
| TBQ90  | 115  | 0.049  | 0.593  | 0.5531 | 0.029  | TBQ90  | 332  | 0.142  | 1.724  | 0.0847 | 0.230  |
| TQ3090 | -222 | -0.095 | -1.145 | 0.2523 | -0.329 | TQ3090 | -190 | -0.081 | -0.979 | 0.3276 | -0.456 |
| TQ5090 | -152 | -0.065 | -0.782 | 0.4342 | -0.306 | TQ5090 | 28   | 0.012  | 0.140  | 0.8888 | 0.047  |

| DD   | S    | Tau    | Z-Value | P-value | Sen's Slope | ON   | S    | Tau    | Z-Value | P-value | Sen's Slope |
|------|------|--------|---------|---------|-------------|------|------|--------|---------|---------|-------------|
| NovL | -208 | -0.089 | -1.072  | 0.2836  | -0.008      | NovL | -624 | -0.266 | -3.227  | 0.0013  | -0.010      |
| DecL | -150 | -0.064 | -0.772  | 0.4403  | -0.006      | DecL | -536 | -0.228 | -2.771  | 0.0056  | -0.010      |
| JanL | 188  | 0.080  | 0.969   | 0.3328  | 0.008       | JanL | -204 | -0.087 | -1.051  | 0.2931  | -0.004      |
| FebL | 194  | 0.083  | 1.000   | 0.3175  | 0.011       | FebL | -122 | -0.052 | -0.627  | 0.5308  | -0.003      |
| MarL | 312  | 0.133  | 1.611   | 0.1072  | 0.018       | MarL | -58  | -0.025 | -0.295  | 0.7678  | -0.002      |
| AprL | 38   | 0.016  | 0.192   | 0.8480  | 0.001       | AprL | -567 | -0.242 | -2.932  | 0.0034  | -0.011      |
| MayL | 230  | 0.098  | 1.186   | 0.2356  | 0.007       | MayL | -430 | -0.183 | -2.222  | 0.0263  | -0.005      |
| JunL | 180  | 0.077  | 0.927   | 0.3539  | 0.005       | JunL | -202 | -0.086 | -1.041  | 0.2978  | -0.001      |
| JulL | 236  | 0.101  | 1.217   | 0.2235  | 0.007       | JulL | -82  | -0.035 | -0.420  | 0.6748  | -0.001      |
| AugL | 298  | 0.127  | 1.538   | 0.1240  | 0.009       | AugL | -276 | -0.118 | -1.424  | 0.1543  | -0.003      |
| SepL | 220  | 0.094  | 1.134   | 0.2567  | 0.006       | SepL | -286 | -0.122 | -1.476  | 0.1399  | -0.003      |
| OctL | -90  | -0.038 | -0.461  | 0.6448  | -0.002      | OctL | -416 | -0.177 | -2.149  | 0.0316  | -0.005      |
| WHL  | -108 | -0.046 | -0.554  | 0.5794  | -0.004      | WHL  | -628 | -0.268 | -3.248  | 0.0012  | -0.008      |
| SHL  | 184  | 0.078  | 0.948   | 0.3432  | 0.005       | SHL  | -122 | -0.052 | -0.627  | 0.5308  | -0.001      |
| YL   | 92   | 0.039  | 0.471   | 0.6374  | 0.002       | YL   | -156 | -0.066 | -0.803  | 0.4221  | -0.001      |
| NovM | -244 | -0.104 | -1.259  | 0.2082  | -0.010      | NovM | -554 | -0.236 | -2.864  | 0.0042  | -0.015      |
| DecM | -274 | -0.117 | -1.414  | 0.1574  | -0.014      | DecM | -396 | -0.169 | -2.046  | 0.0408  | -0.015      |
| JanM | -52  | -0.022 | -0.264  | 0.7917  | -0.003      | JanM | -160 | -0.068 | -0.824  | 0.4102  | -0.008      |
| FebM | -6   | -0.003 | -0.026  | 0.9793  | 0.000       | FebM | -156 | -0.066 | -0.803  | 0.4221  | -0.009      |
| MarM | 152  | 0.065  | 0.782   | 0.4342  | 0.011       | MarM | -282 | -0.120 | -1.455  | 0.1455  | -0.019      |
| AprM | -4   | -0.002 | -0.016  | 0.9876  | 0.000       | AprM | -354 | -0.151 | -1.828  | 0.0675  | -0.014      |
| MayM | -78  | -0.033 | -0.399  | 0.6900  | -0.003      | MayM | -342 | -0.146 | -1.766  | 0.0774  | -0.009      |
| JunM | 170  | 0.072  | 0.875   | 0.3814  | 0.006       | JunM | -368 | -0.157 | -1.901  | 0.0573  | -0.007      |
| JulM | 258  | 0.110  | 1.331   | 0.1831  | 0.008       | JulM | -362 | -0.154 | -1.870  | 0.0615  | -0.005      |
| AugM | 134  | 0.057  | 0.689   | 0.4909  | 0.006       | AugM | -352 | -0.150 | -1.818  | 0.0691  | -0.005      |
| SepM | 128  | 0.055  | 0.658   | 0.5107  | 0.004       | SepM | -328 | -0.140 | -1.694  | 0.0903  | -0.005      |
| OctM | -180 | -0.077 | -0.927  | 0.3539  | -0.006      | OctM | -492 | -0.210 | -2.543  | 0.0110  | -0.008      |
| WHM  | -96  | -0.041 | -0.492  | 0.6227  | -0.005      | WHM  | -314 | -0.134 | -1.621  | 0.1050  | -0.013      |

|        |      |        |        |        |        |        |      |        |        |        |        |
|--------|------|--------|--------|--------|--------|--------|------|--------|--------|--------|--------|
| SHM    | 64   | 0.027  | 0.326  | 0.7442 | 0.002  | SHM    | -458 | -0.195 | -2.367 | 0.0179 | -0.008 |
| YM     | -14  | -0.006 | -0.067 | 0.9463 | 0.000  | YM     | -316 | -0.135 | -1.632 | 0.1028 | -0.010 |
| NovH   | -332 | -0.142 | -1.714 | 0.0865 | -0.017 | NovH   | -530 | -0.226 | -2.740 | 0.0061 | -0.023 |
| DecH   | -362 | -0.154 | -1.870 | 0.0615 | -0.027 | DecH   | -422 | -0.180 | -2.181 | 0.0292 | -0.029 |
| JanH   | -328 | -0.140 | -1.694 | 0.0903 | -0.033 | JanH   | -190 | -0.081 | -0.979 | 0.3276 | -0.020 |
| FebH   | -148 | -0.063 | -0.761 | 0.4464 | -0.015 | FebH   | -234 | -0.100 | -1.207 | 0.2275 | -0.034 |
| MarH   | -74  | -0.032 | -0.378 | 0.7054 | -0.006 | MarH   | -416 | -0.177 | -2.149 | 0.0316 | -0.079 |
| AprH   | -120 | -0.051 | -0.616 | 0.5377 | -0.009 | AprH   | -212 | -0.090 | -1.093 | 0.2744 | -0.023 |
| MayH   | -80  | -0.034 | -0.409 | 0.6824 | -0.006 | MayH   | -176 | -0.075 | -0.906 | 0.3647 | -0.013 |
| JunH   | 164  | 0.070  | 0.844  | 0.3985 | 0.007  | JunH   | -344 | -0.147 | -1.777 | 0.0756 | -0.012 |
| JulH   | 188  | 0.080  | 0.969  | 0.3328 | 0.008  | JulH   | -362 | -0.154 | -1.870 | 0.0615 | -0.009 |
| AugH   | 80   | 0.034  | 0.409  | 0.6824 | 0.003  | AugH   | -414 | -0.176 | -2.139 | 0.0324 | -0.009 |
| SepH   | 26   | 0.011  | 0.129  | 0.8970 | 0.001  | SepH   | -340 | -0.145 | -1.756 | 0.0791 | -0.007 |
| OctH   | -246 | -0.105 | -1.269 | 0.2044 | -0.011 | OctH   | -506 | -0.216 | -2.616 | 0.0089 | -0.012 |
| WHH    | -538 | -0.229 | -2.781 | 0.0054 | -0.062 | WHH    | -592 | -0.252 | -3.061 | 0.0022 | -0.158 |
| SHH    | -188 | -0.080 | -0.969 | 0.3328 | -0.013 | SHH    | -198 | -0.084 | -1.020 | 0.3076 | -0.020 |
| YH     | -534 | -0.228 | -2.761 | 0.0058 | -0.055 | YH     | -486 | -0.207 | -2.512 | 0.0120 | -0.140 |
| DL3    | 98   | 0.042  | 0.502  | 0.6154 | 0.002  | DL3    | -216 | -0.092 | -1.114 | 0.2655 | -0.001 |
| DL7    | 100  | 0.043  | 0.513  | 0.6081 | 0.002  | DL7    | -228 | -0.097 | -1.176 | 0.2397 | -0.002 |
| DL30   | 100  | 0.043  | 0.513  | 0.6081 | 0.003  | DL30   | -336 | -0.143 | -1.735 | 0.0827 | -0.003 |
| DL90   | 148  | 0.063  | 0.761  | 0.4464 | 0.004  | DL90   | -518 | -0.221 | -2.678 | 0.0074 | -0.005 |
| TBQ30  | 23   | 0.010  | 0.114  | 0.9093 | 0.053  | TBQ30  | 382  | 0.163  | 1.973  | 0.0485 | 0.730  |
| TBQ50  | 4    | 0.002  | 0.016  | 0.9876 | 0.004  | TBQ50  | 608  | 0.259  | 3.144  | 0.0017 | 1.248  |
| TBQ70  | -24  | -0.010 | -0.119 | 0.9052 | -0.049 | TBQ70  | 710  | 0.303  | 3.672  | 0.0002 | 1.606  |
| TBQ90  | 76   | 0.032  | 0.401  | 0.6884 | 0.000  | TBQ90  | 141  | 0.060  | 0.728  | 0.4664 | 0.036  |
| TQ3090 | 202  | 0.086  | 1.041  | 0.2978 | 0.384  | TQ3090 | -68  | -0.029 | -0.347 | 0.7286 | -0.135 |
| TQ5090 | 184  | 0.078  | 0.948  | 0.3432 | 0.321  | TQ5090 | 290  | 0.124  | 1.497  | 0.1344 | 0.554  |

|    |   |     |         |         |             |    |   |     |         |         |             |
|----|---|-----|---------|---------|-------------|----|---|-----|---------|---------|-------------|
| WP | S | Tau | Z-Value | P-value | Sen's Slope | GP | S | Tau | Z-Value | P-value | Sen's Slope |
|----|---|-----|---------|---------|-------------|----|---|-----|---------|---------|-------------|

|      |      |        |        |        |        |      |      |        |        |        |        |
|------|------|--------|--------|--------|--------|------|------|--------|--------|--------|--------|
| NovL | -200 | -0.085 | -1.031 | 0.3027 | -0.007 | NovL | 320  | 0.136  | 1.652  | 0.0985 | 0.059  |
| DecL | -174 | -0.074 | -0.896 | 0.3702 | -0.007 | DecL | 740  | 0.315  | 3.828  | 0.0001 | 0.136  |
| JanL | -120 | -0.051 | -0.616 | 0.5377 | -0.005 | JanL | 826  | 0.352  | 4.273  | 0.0000 | 0.179  |
| FebL | 62   | 0.026  | 0.316  | 0.7520 | 0.003  | FebL | 830  | 0.354  | 4.294  | 0.0000 | 0.197  |
| MarL | -28  | -0.012 | -0.140 | 0.8888 | -0.002 | MarL | 918  | 0.391  | 4.750  | 0.0000 | 0.199  |
| AprL | -226 | -0.096 | -1.165 | 0.2439 | -0.011 | AprL | 516  | 0.220  | 2.667  | 0.0076 | 0.099  |
| MayL | -250 | -0.107 | -1.290 | 0.1972 | -0.009 | MayL | 268  | 0.114  | 1.383  | 0.1667 | 0.049  |
| JunL | -188 | -0.080 | -0.969 | 0.3328 | -0.004 | JunL | 128  | 0.055  | 0.658  | 0.5107 | 0.019  |
| JulL | -132 | -0.056 | -0.679 | 0.4974 | -0.003 | JulL | 2    | 0.001  | 0.005  | 0.9959 | 0.000  |
| AugL | -66  | -0.028 | -0.337 | 0.7364 | -0.001 | AugL | 4    | 0.002  | 0.016  | 0.9876 | 0.000  |
| SepL | -126 | -0.054 | -0.647 | 0.5173 | -0.002 | SepL | 18   | 0.008  | 0.088  | 0.9298 | 0.002  |
| OctL | -292 | -0.124 | -1.507 | 0.1317 | -0.006 | OctL | 84   | 0.036  | 0.430  | 0.6673 | 0.014  |
| WHL  | -148 | -0.063 | -0.761 | 0.4464 | -0.005 | WHL  | 894  | 0.381  | 4.625  | 0.0000 | 0.135  |
| SHL  | -190 | -0.081 | -0.979 | 0.3276 | -0.003 | SHL  | 164  | 0.070  | 0.844  | 0.3985 | 0.020  |
| YL   | -194 | -0.083 | -1.000 | 0.3175 | -0.003 | YL   | 524  | 0.223  | 2.709  | 0.0068 | 0.052  |
| NovM | -118 | -0.050 | -0.606 | 0.5445 | -0.006 | NovM | 80   | 0.034  | 0.409  | 0.6824 | 0.013  |
| DecM | -122 | -0.052 | -0.627 | 0.5308 | -0.008 | DecM | 376  | 0.160  | 1.942  | 0.0521 | 0.065  |
| JanM | -74  | -0.032 | -0.378 | 0.7054 | -0.004 | JanM | 446  | 0.190  | 2.305  | 0.0212 | 0.133  |
| FebM | -52  | -0.022 | -0.264 | 0.7917 | -0.005 | FebM | 468  | 0.199  | 2.419  | 0.0156 | 0.138  |
| MarM | -66  | -0.028 | -0.337 | 0.7364 | -0.006 | MarM | 446  | 0.190  | 2.305  | 0.0212 | 0.109  |
| AprM | -214 | -0.091 | -1.103 | 0.2699 | -0.017 | AprM | 214  | 0.091  | 1.103  | 0.2699 | 0.041  |
| MayM | -258 | -0.110 | -1.331 | 0.1831 | -0.013 | MayM | -42  | -0.018 | -0.212 | 0.8318 | -0.007 |
| JunM | -180 | -0.077 | -0.927 | 0.3539 | -0.005 | JunM | -310 | -0.132 | -1.600 | 0.1095 | -0.050 |
| JulM | -190 | -0.081 | -0.979 | 0.3276 | -0.004 | JulM | -428 | -0.182 | -2.212 | 0.0270 | -0.063 |
| AugM | -152 | -0.065 | -0.782 | 0.4342 | -0.003 | AugM | -434 | -0.185 | -2.243 | 0.0249 | -0.070 |
| SepM | -106 | -0.045 | -0.544 | 0.5865 | -0.003 | SepM | -402 | -0.171 | -2.077 | 0.0378 | -0.066 |
| OctM | -236 | -0.101 | -1.217 | 0.2235 | -0.007 | OctM | -310 | -0.132 | -1.600 | 0.1095 | -0.049 |
| WHM  | -144 | -0.061 | -0.741 | 0.4589 | -0.011 | WHM  | 388  | 0.165  | 2.004  | 0.0450 | 0.078  |
| SHM  | -226 | -0.096 | -1.165 | 0.2439 | -0.007 | SHM  | -352 | -0.150 | -1.818 | 0.0691 | -0.051 |

|        |      |        |        |        |        |        |      |        |        |        |        |
|--------|------|--------|--------|--------|--------|--------|------|--------|--------|--------|--------|
| YM     | -154 | -0.066 | -0.792 | 0.4281 | -0.007 | YM     | 90   | 0.038  | 0.461  | 0.6448 | 0.014  |
| NovH   | -144 | -0.061 | -0.741 | 0.4589 | -0.006 | NovH   | -294 | -0.125 | -1.518 | 0.1291 | -0.074 |
| DecH   | -214 | -0.091 | -1.103 | 0.2699 | -0.016 | DecH   | -68  | -0.029 | -0.347 | 0.7286 | -0.013 |
| JanH   | -112 | -0.048 | -0.575 | 0.5653 | -0.009 | JanH   | 180  | 0.077  | 0.927  | 0.3539 | 0.063  |
| FebH   | -150 | -0.064 | -0.772 | 0.4403 | -0.013 | FebH   | 182  | 0.078  | 0.937  | 0.3485 | 0.076  |
| MarH   | -120 | -0.051 | -0.616 | 0.5377 | -0.011 | MarH   | 154  | 0.066  | 0.792  | 0.4281 | 0.052  |
| AprH   | -228 | -0.097 | -1.176 | 0.2397 | -0.024 | AprH   | -142 | -0.061 | -0.730 | 0.4652 | -0.042 |
| MayH   | -202 | -0.086 | -1.041 | 0.2978 | -0.015 | MayH   | -340 | -0.145 | -1.756 | 0.0791 | -0.096 |
| JunH   | -166 | -0.071 | -0.855 | 0.3928 | -0.006 | JunH   | -596 | -0.254 | -3.082 | 0.0021 | -0.144 |
| JulH   | -116 | -0.049 | -0.596 | 0.5514 | -0.004 | JulH   | -512 | -0.218 | -2.647 | 0.0081 | -0.121 |
| AugH   | -132 | -0.056 | -0.679 | 0.4974 | -0.003 | AugH   | -740 | -0.315 | -3.828 | 0.0001 | -0.178 |
| SepH   | -130 | -0.055 | -0.668 | 0.5040 | -0.004 | SepH   | -686 | -0.292 | -3.548 | 0.0004 | -0.158 |
| OctH   | -200 | -0.085 | -1.031 | 0.3027 | -0.008 | OctH   | -654 | -0.279 | -3.382 | 0.0007 | -0.159 |
| WHH    | -208 | -0.089 | -1.072 | 0.2836 | -0.025 | WHH    | -20  | -0.009 | -0.098 | 0.9216 | -0.007 |
| SHH    | -218 | -0.093 | -1.124 | 0.2610 | -0.018 | SHH    | -534 | -0.228 | -2.761 | 0.0058 | -0.147 |
| YH     | -188 | -0.080 | -0.969 | 0.3328 | -0.035 | YH     | -32  | -0.014 | -0.161 | 0.8724 | -0.014 |
| DL3    | -160 | -0.068 | -0.824 | 0.4102 | -0.002 | DL3    | 418  | 0.178  | 2.160  | 0.0308 | 0.043  |
| DL7    | -148 | -0.063 | -0.761 | 0.4464 | -0.002 | DL7    | 354  | 0.151  | 1.828  | 0.0675 | 0.036  |
| DL30   | -152 | -0.065 | -0.782 | 0.4342 | -0.002 | DL30   | 162  | 0.069  | 0.834  | 0.4043 | 0.018  |
| DL90   | -138 | -0.059 | -0.710 | 0.4780 | -0.002 | DL90   | 10   | 0.004  | 0.047  | 0.9628 | 0.002  |
| TBQ30  | 114  | 0.049  | 0.585  | 0.5584 | 0.225  | TBQ30  | -218 | -0.093 | -1.124 | 0.2610 | -0.405 |
| TBQ50  | 202  | 0.086  | 1.041  | 0.2978 | 0.645  | TBQ50  | -226 | -0.096 | -1.165 | 0.2439 | -0.505 |
| TBQ70  | 232  | 0.099  | 1.196  | 0.2315 | 0.586  | TBQ70  | -58  | -0.025 | -0.295 | 0.7678 | -0.109 |
| TBQ90  | 257  | 0.110  | 1.341  | 0.1800 | 0.035  | TBQ90  | 60   | 0.026  | 0.306  | 0.7594 | 0.007  |
| TQ3090 | -62  | -0.026 | -0.316 | 0.7520 | -0.144 | TQ3090 | -444 | -0.189 | -2.295 | 0.0218 | -0.769 |
| TQ5090 | -38  | -0.016 | -0.192 | 0.8480 | -0.141 | TQ5090 | -514 | -0.219 | -2.657 | 0.0079 | -0.784 |

| FR   | S    | Tau    | Z-Value | P-value | Sen's Slope | OO   | S    | Tau    | Z-Value | P-value | Sen's Slope |
|------|------|--------|---------|---------|-------------|------|------|--------|---------|---------|-------------|
| NovL | -188 | -0.080 | -0.969  | 0.3328  | -0.001      | NovL | -518 | -0.221 | -2.678  | 0.0074  | -0.006      |

|      |      |        |        |        |        |      |      |        |        |        |        |
|------|------|--------|--------|--------|--------|------|------|--------|--------|--------|--------|
| DecL | -160 | -0.068 | -0.824 | 0.4102 | -0.001 | DecL | -578 | -0.246 | -2.989 | 0.0028 | -0.010 |
| JanL | 20   | 0.009  | 0.098  | 0.9216 | 0.000  | JanL | -548 | -0.234 | -2.833 | 0.0046 | -0.009 |
| FebL | 168  | 0.072  | 0.865  | 0.3871 | 0.001  | FebL | -584 | -0.249 | -3.020 | 0.0025 | -0.011 |
| MarL | 4    | 0.002  | 0.016  | 0.9876 | 0.000  | MarL | -430 | -0.183 | -2.222 | 0.0263 | -0.009 |
| AprL | -548 | -0.234 | -2.833 | 0.0046 | -0.004 | AprL | -554 | -0.236 | -2.864 | 0.0042 | -0.008 |
| MayL | -530 | -0.226 | -2.740 | 0.0061 | -0.002 | MayL | -254 | -0.108 | -1.310 | 0.1901 | -0.002 |
| JunL | -474 | -0.202 | -2.450 | 0.0143 | -0.001 | JunL | -14  | -0.006 | -0.067 | 0.9463 | 0.000  |
| JulL | -306 | -0.130 | -1.580 | 0.1142 | -0.001 | JulL | 256  | 0.109  | 1.321  | 0.1866 | 0.001  |
| AugL | -236 | -0.101 | -1.217 | 0.2235 | -0.001 | AugL | 58   | 0.025  | 0.295  | 0.7678 | 0.000  |
| SepL | -258 | -0.110 | -1.331 | 0.1831 | -0.001 | SepL | -312 | -0.133 | -1.611 | 0.1072 | -0.002 |
| OctL | -244 | -0.104 | -1.259 | 0.2082 | -0.001 | OctL | -616 | -0.263 | -3.185 | 0.0014 | -0.005 |
| WHL  | -262 | -0.112 | -1.352 | 0.1764 | -0.001 | WHL  | -698 | -0.298 | -3.610 | 0.0003 | -0.006 |
| SHL  | -440 | -0.188 | -2.274 | 0.0230 | -0.001 | SHL  | 174  | 0.074  | 0.896  | 0.3702 | 0.001  |
| YL   | -440 | -0.188 | -2.274 | 0.0230 | -0.001 | YL   | 154  | 0.066  | 0.792  | 0.4281 | 0.001  |
| NovM | -184 | -0.078 | -0.948 | 0.3432 | -0.001 | NovM | -426 | -0.182 | -2.201 | 0.0277 | -0.009 |
| DecM | -198 | -0.084 | -1.020 | 0.3076 | -0.003 | DecM | -464 | -0.198 | -2.398 | 0.0165 | -0.014 |
| JanM | -112 | -0.048 | -0.575 | 0.5653 | -0.001 | JanM | -254 | -0.108 | -1.310 | 0.1901 | -0.010 |
| FebM | 42   | 0.018  | 0.212  | 0.8318 | 0.001  | FebM | -216 | -0.092 | -1.114 | 0.2655 | -0.009 |
| MarM | 68   | 0.029  | 0.347  | 0.7286 | 0.001  | MarM | -272 | -0.116 | -1.404 | 0.1604 | -0.012 |
| AprM | -447 | -0.191 | -2.310 | 0.0209 | -0.005 | AprM | -430 | -0.183 | -2.222 | 0.0263 | -0.013 |
| MayM | -552 | -0.235 | -2.854 | 0.0043 | -0.005 | MayM | -220 | -0.094 | -1.134 | 0.2567 | -0.003 |
| JunM | -342 | -0.146 | -1.766 | 0.0774 | -0.002 | JunM | -144 | -0.061 | -0.741 | 0.4589 | -0.002 |
| JulM | -296 | -0.126 | -1.528 | 0.1265 | -0.001 | JulM | 184  | 0.078  | 0.948  | 0.3432 | 0.002  |
| AugM | -164 | -0.070 | -0.844 | 0.3985 | -0.001 | AugM | -102 | -0.043 | -0.523 | 0.6009 | -0.001 |
| SepM | -214 | -0.091 | -1.103 | 0.2699 | -0.001 | SepM | -302 | -0.129 | -1.559 | 0.1190 | -0.003 |
| OctM | -270 | -0.115 | -1.393 | 0.1635 | -0.002 | OctM | -368 | -0.157 | -1.901 | 0.0573 | -0.006 |
| WHM  | -122 | -0.052 | -0.627 | 0.5308 | -0.002 | WHM  | -350 | -0.149 | -1.808 | 0.0707 | -0.011 |
| SHM  | -396 | -0.169 | -2.046 | 0.0408 | -0.002 | SHM  | -228 | -0.097 | -1.176 | 0.2397 | -0.003 |
| YM   | -170 | -0.072 | -0.875 | 0.3814 | -0.001 | YM   | -278 | -0.118 | -1.435 | 0.1514 | -0.006 |

|        |      |        |        |        |        |        |      |        |        |        |        |
|--------|------|--------|--------|--------|--------|--------|------|--------|--------|--------|--------|
| NovH   | -242 | -0.103 | -1.248 | 0.2119 | -0.003 | NovH   | -250 | -0.107 | -1.290 | 0.1972 | -0.009 |
| DecH   | -250 | -0.107 | -1.290 | 0.1972 | -0.005 | DecH   | -390 | -0.166 | -2.015 | 0.0439 | -0.024 |
| JanH   | -136 | -0.058 | -0.699 | 0.4844 | -0.004 | JanH   | -82  | -0.035 | -0.420 | 0.6748 | -0.007 |
| FebH   | 6    | 0.003  | 0.026  | 0.9793 | 0.000  | FebH   | -80  | -0.034 | -0.409 | 0.6824 | -0.011 |
| MarH   | -158 | -0.067 | -0.813 | 0.4161 | -0.006 | MarH   | -134 | -0.057 | -0.689 | 0.4909 | -0.013 |
| AprH   | -384 | -0.164 | -1.984 | 0.0473 | -0.008 | AprH   | -198 | -0.084 | -1.020 | 0.3076 | -0.012 |
| MayH   | -468 | -0.199 | -2.419 | 0.0156 | -0.007 | MayH   | -108 | -0.046 | -0.554 | 0.5794 | -0.004 |
| JunH   | -286 | -0.122 | -1.476 | 0.1399 | -0.003 | JunH   | -224 | -0.095 | -1.155 | 0.2481 | -0.005 |
| JulH   | -268 | -0.114 | -1.383 | 0.1667 | -0.002 | JulH   | 152  | 0.065  | 0.782  | 0.4342 | 0.002  |
| AugH   | -130 | -0.055 | -0.668 | 0.5040 | -0.001 | AugH   | -132 | -0.056 | -0.679 | 0.4974 | -0.002 |
| SepH   | -154 | -0.066 | -0.792 | 0.4281 | -0.001 | SepH   | -164 | -0.070 | -0.844 | 0.3985 | -0.003 |
| OctH   | -246 | -0.105 | -1.269 | 0.2044 | -0.002 | OctH   | -220 | -0.094 | -1.134 | 0.2567 | -0.005 |
| WHH    | -162 | -0.069 | -0.834 | 0.4043 | -0.008 | WHH    | -356 | -0.152 | -1.839 | 0.0660 | -0.058 |
| SHH    | -482 | -0.205 | -2.491 | 0.0127 | -0.009 | SHH    | -22  | -0.009 | -0.109 | 0.9134 | -0.001 |
| YH     | -196 | -0.084 | -1.010 | 0.3125 | -0.011 | YH     | -266 | -0.113 | -1.373 | 0.1699 | -0.043 |
| DL3    | -450 | -0.192 | -2.326 | 0.0200 | -0.001 | DL3    | 156  | 0.066  | 0.803  | 0.4221 | 0.001  |
| DL7    | -454 | -0.194 | -2.346 | 0.0190 | -0.001 | DL7    | 140  | 0.060  | 0.720  | 0.4716 | 0.001  |
| DL30   | -422 | -0.180 | -2.181 | 0.0292 | -0.001 | DL30   | 76   | 0.032  | 0.388  | 0.6977 | 0.000  |
| DL90   | -348 | -0.148 | -1.797 | 0.0723 | -0.001 | DL90   | -112 | -0.048 | -0.575 | 0.5653 | -0.001 |
| TBQ30  | 190  | 0.081  | 0.979  | 0.3276 | 0.428  | TBQ30  | 534  | 0.228  | 2.761  | 0.0058 | 0.966  |
| TBQ50  | 368  | 0.157  | 1.901  | 0.0573 | 0.889  | TBQ50  | 614  | 0.262  | 3.175  | 0.0015 | 1.281  |
| TBQ70  | 548  | 0.234  | 2.833  | 0.0046 | 1.159  | TBQ70  | 436  | 0.186  | 2.253  | 0.0243 | 0.944  |
| TBQ90  | 544  | 0.232  | 2.812  | 0.0049 | 0.240  | TBQ90  | 27   | 0.012  | 0.135  | 0.8923 | 0.000  |
| TQ3090 | -44  | -0.019 | -0.223 | 0.8238 | -0.074 | TQ3090 | 338  | 0.144  | 1.745  | 0.0809 | 0.647  |
| TQ5090 | 38   | 0.016  | 0.192  | 0.8480 | 0.094  | TQ5090 | 518  | 0.221  | 2.678  | 0.0074 | 0.777  |

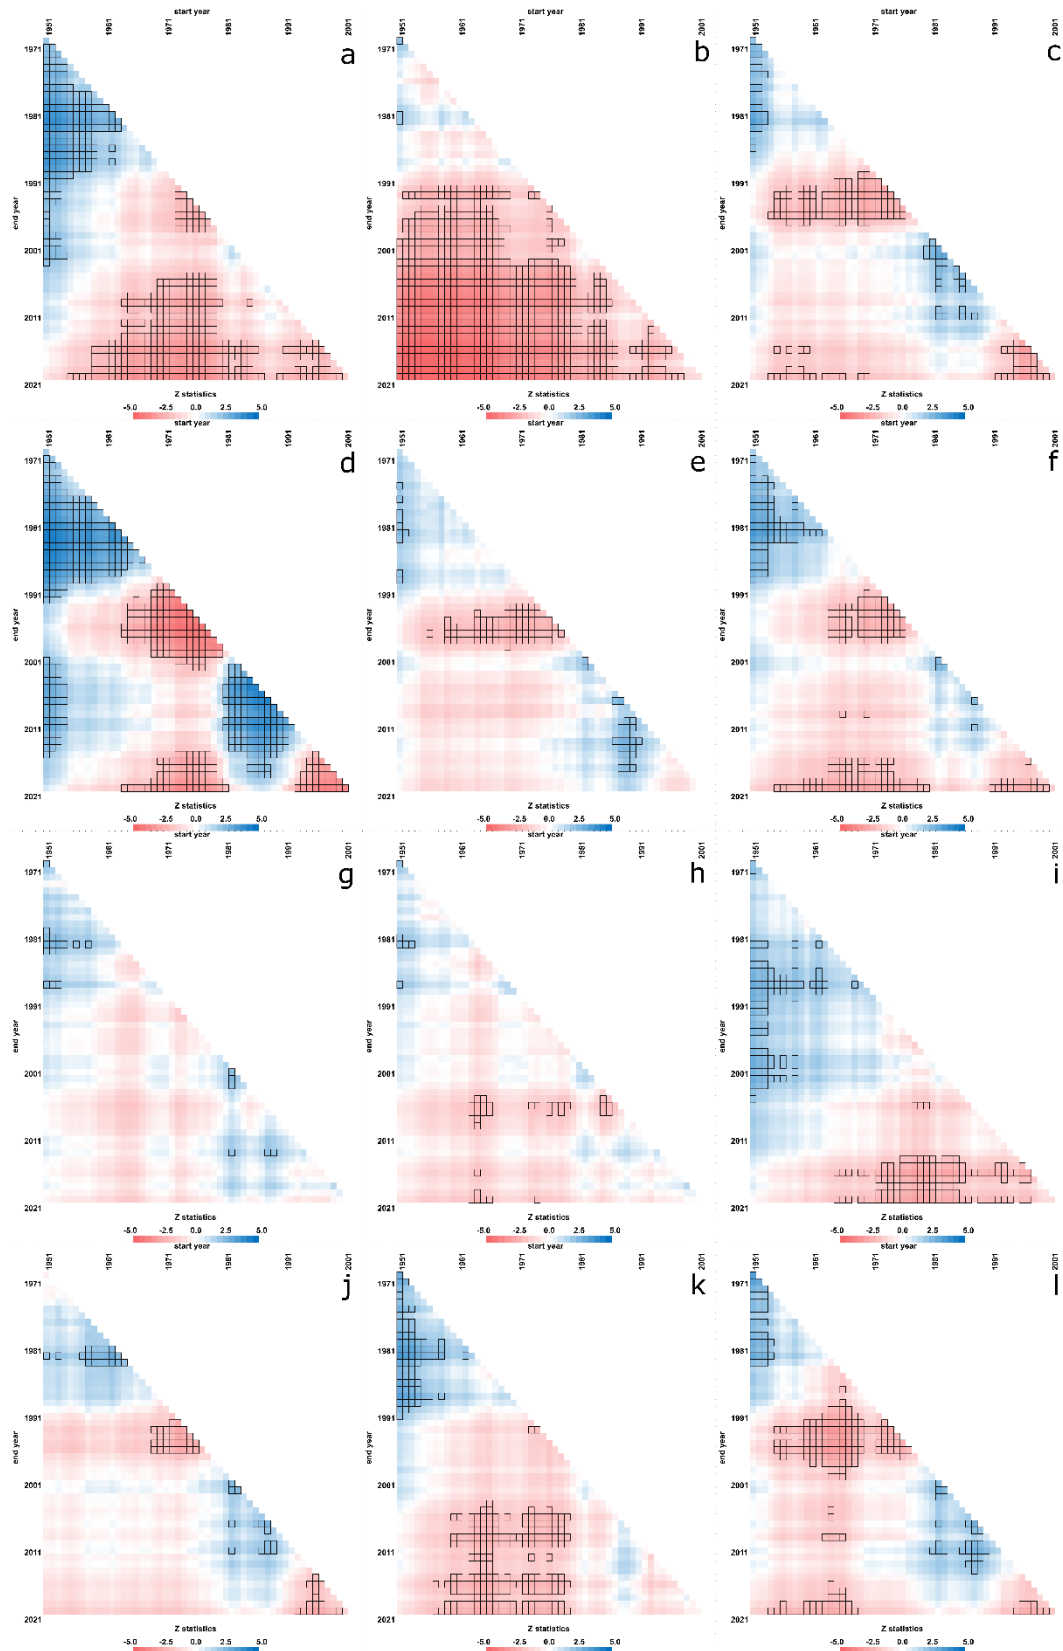

**Figure S1.** Multitemporal trend analysis of mean yearly discharges (YM) - Ner (a), Mała Noteć (b), Grabia (c), Widawka (d), Niesób (e), Prosna (f), Mogilnica (g), Sama (h), Drawa (i), Oleśnica (j), Wełna (k) and Ołobok (l) (marked fields indicate statistically significant changes at the level 0.05)



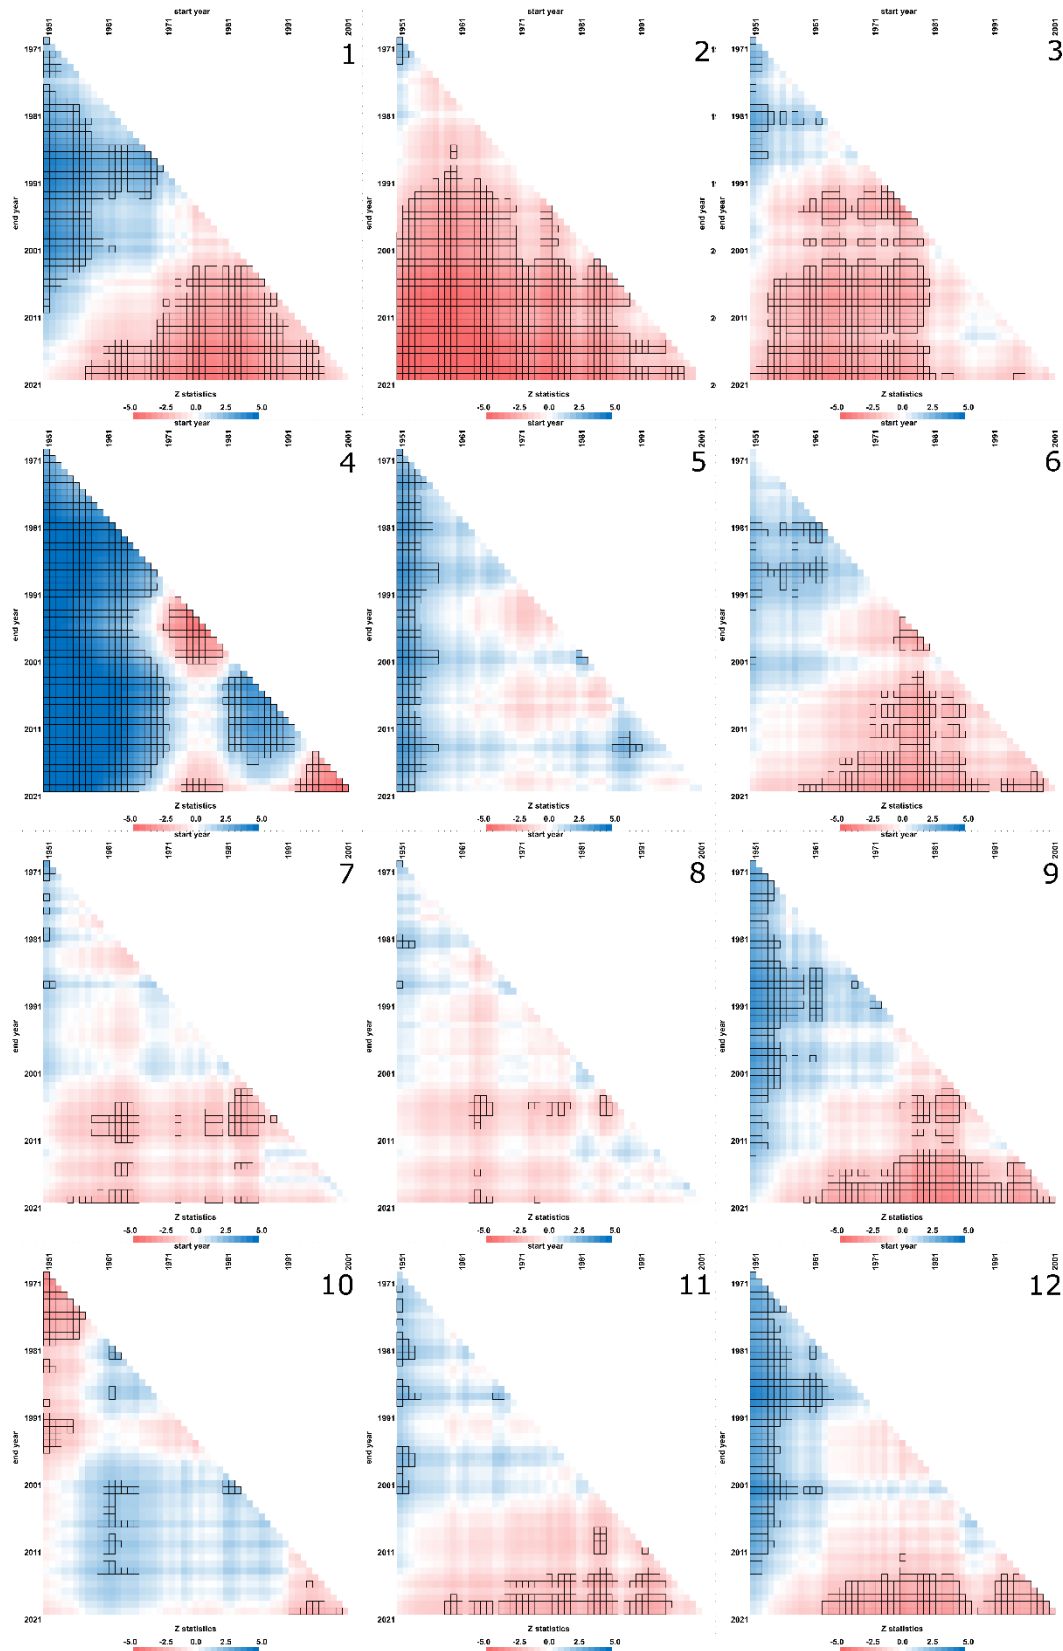

**Figure S2.** Multitemporal trend analysis of 7-days minimum discharges (DL7) - Ner (a), Mała Noteć (b), Grabia (c), Widawka (d), Niesób (e), Prosna (f), Mogilnica (g), Sama (h), Drawa (i), Oleśnica (j), Wełna (k) and Ołobok (l) (marked fields indicate statistically significant changes at the level 0.05)

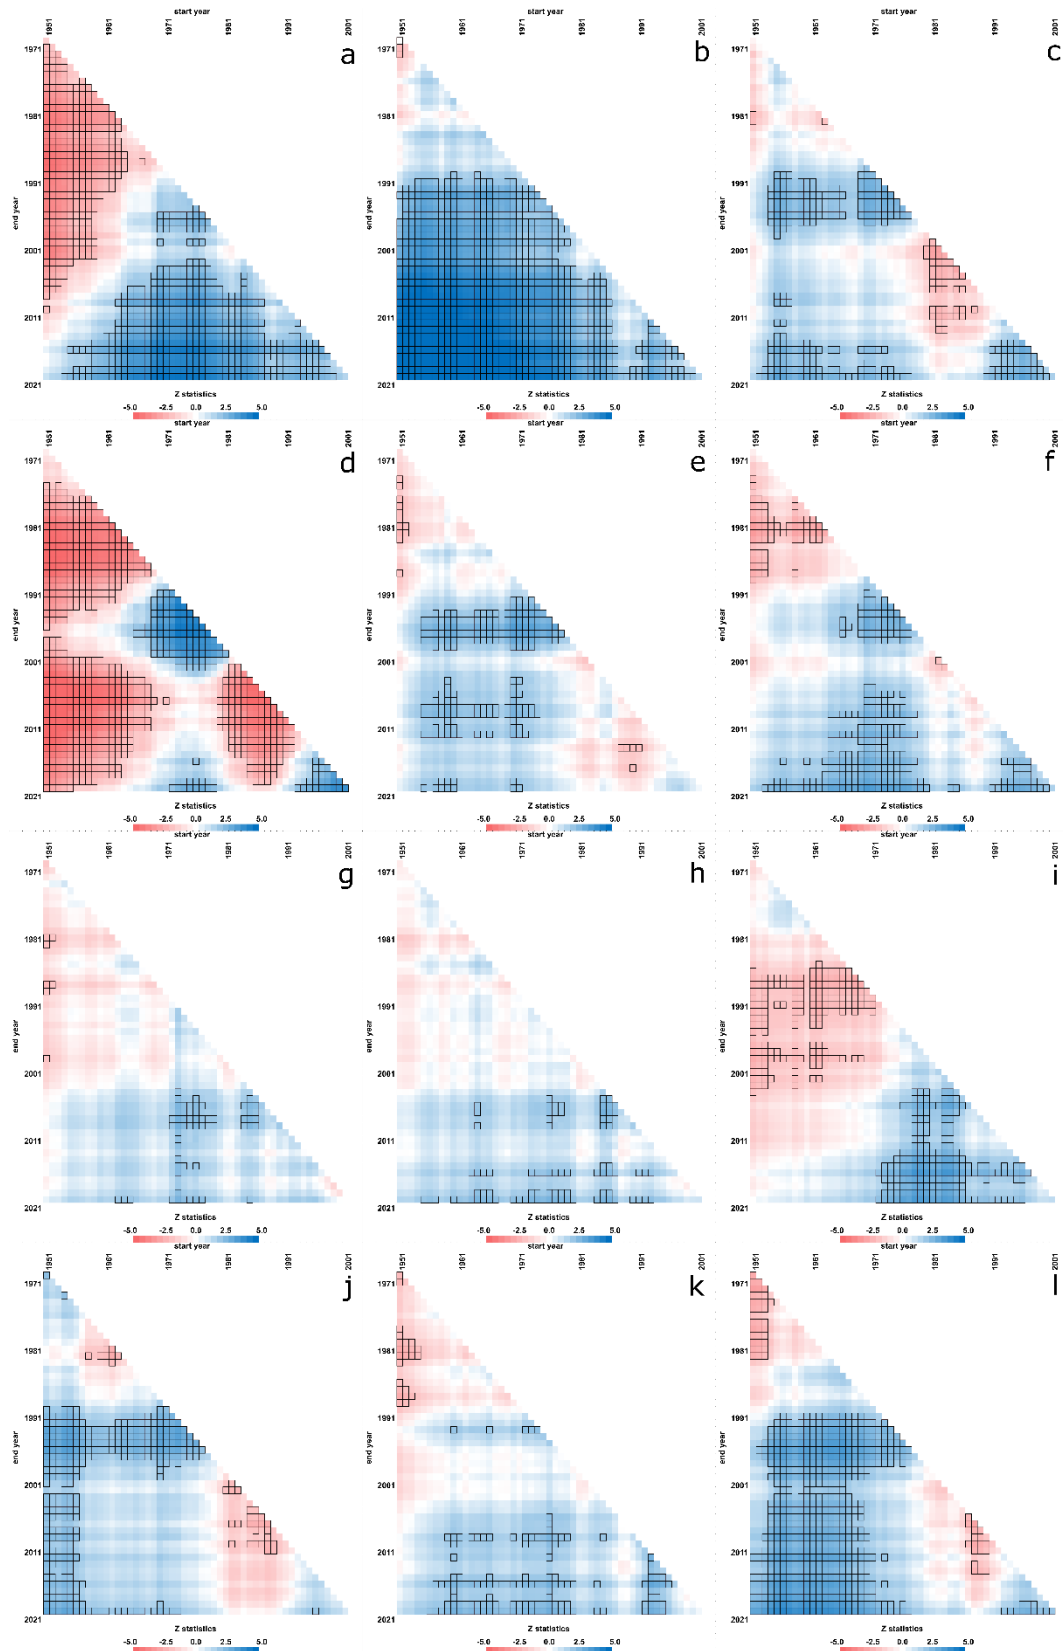

**Figure S3.** Multitemporal trend analysis of flows time below Q50% (TBQ50%) - Ner (a), Mała Noteć (b), Grabia (c), Widawka (d), Niesób (e), Prosna (f), Mogilnica (g), Sama (h), Drawa (i), Oleśnica (j), Wełna (k) and Ołobok (l) (marked fields indicate statistically significant changes at the level 0.05)

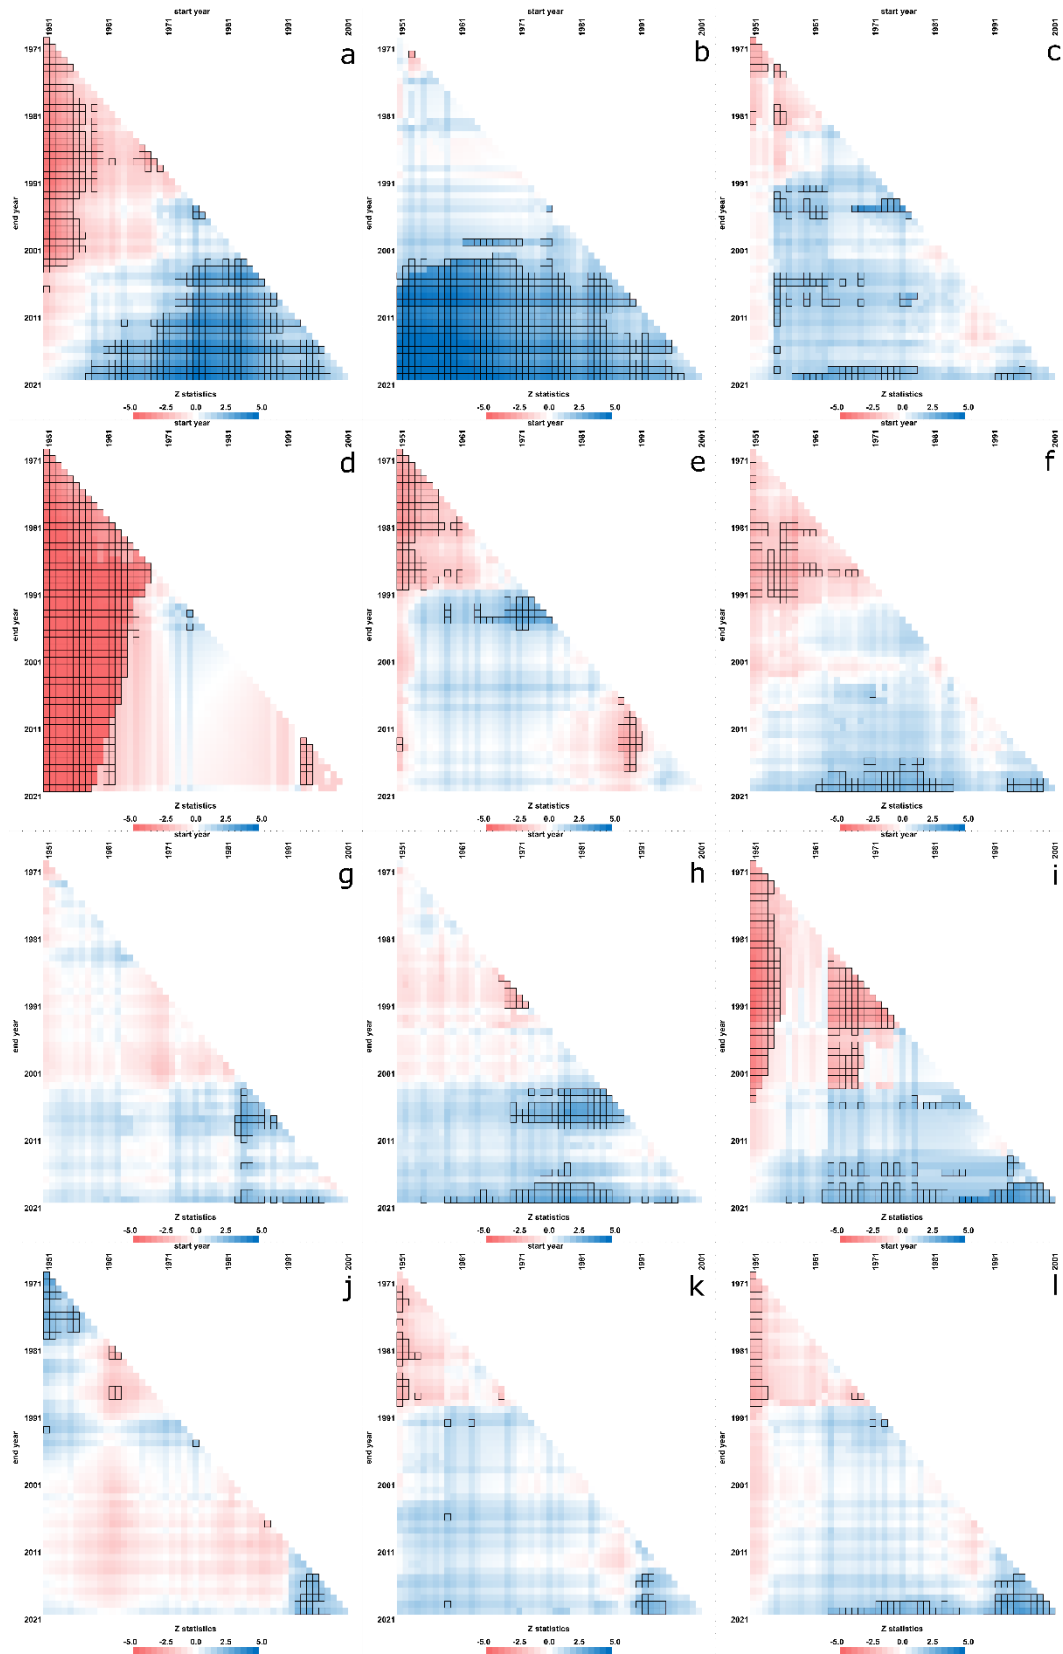

**Figure S4.** Multitemporal trend analysis of flows time below Q90% (TBQ90%) - Ner (a), Mała Noteć (b), Grabia (c), Widawka (d), Niesób (e), Prosna (f), Mogilnica (g), Sama (h), Drawa (i), Oleśnica (j), Wełna (k) and Ołobok (l) (marked fields indicate statistically significant changes at the level 0.05)

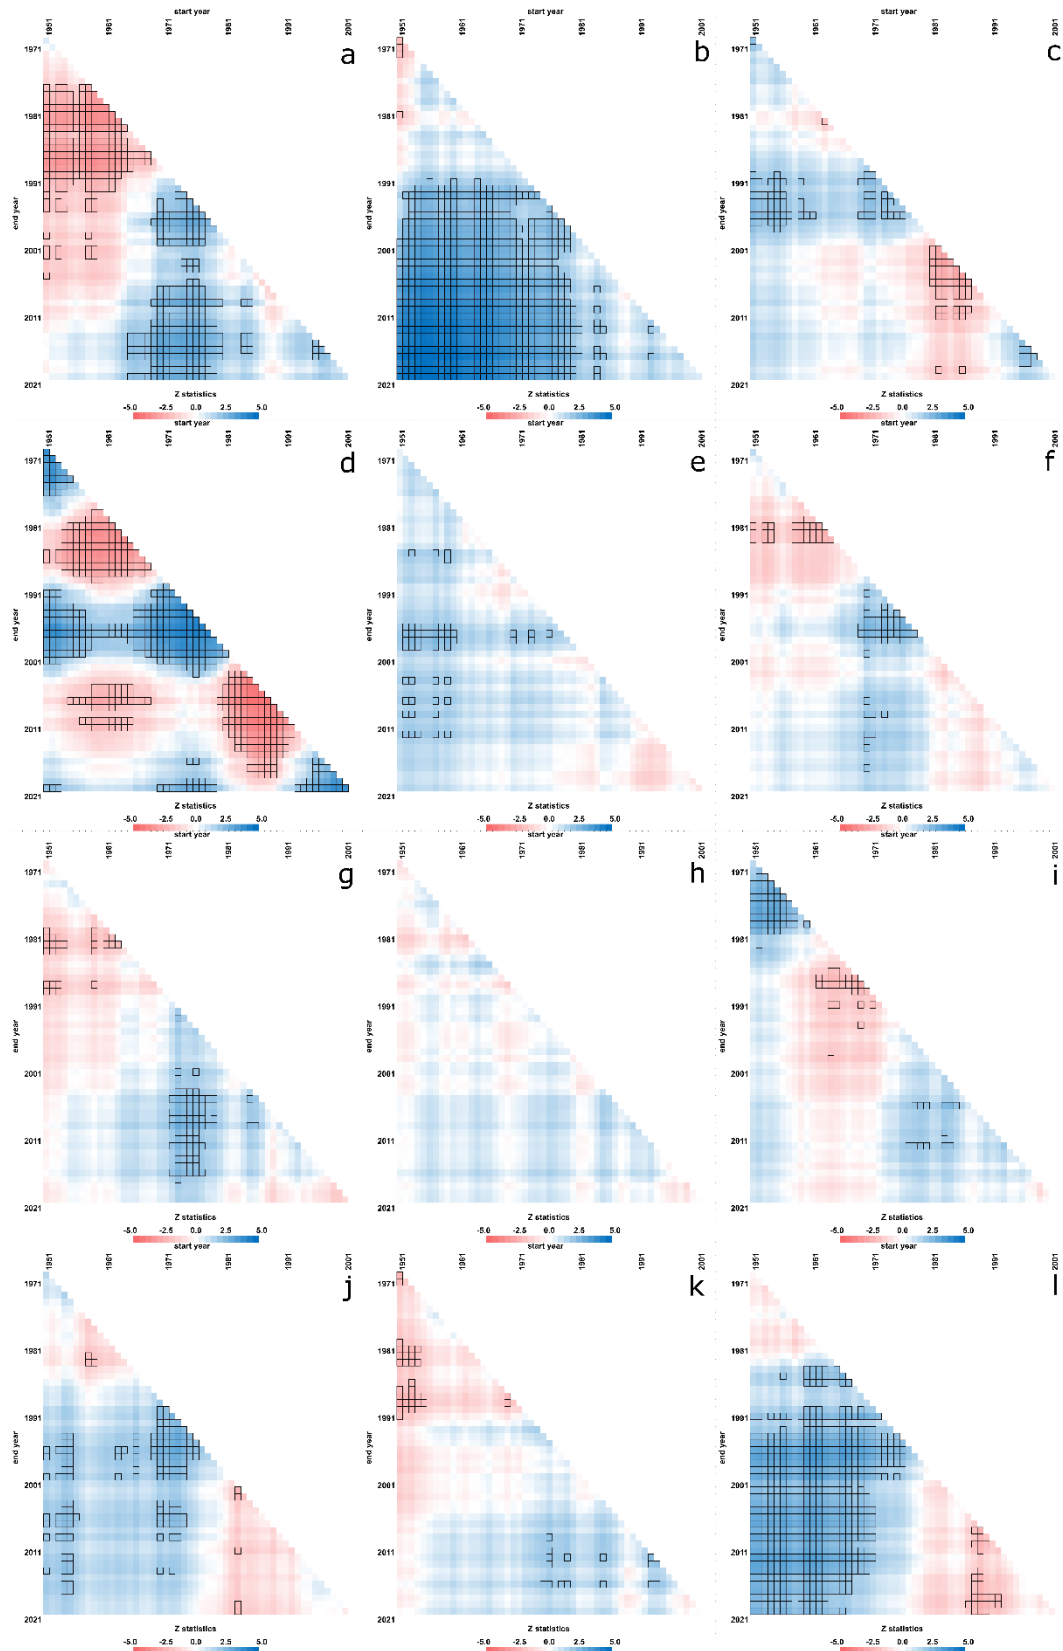

**Figure S5.** Multitemporal trend analysis of flows time below Q90% (TQ5090%) - Ner (a), Mała Noteć (b), Grabia (c), Widawka (d), Niesób (e), Prosna (f), Mogilnica (g), Sama (h), Drawa (i), Oleśnica (j), Wełna (k) and Ołobok (l) (marked fields indicate statistically significant changes at the level 0.05)
